# Supplementary material for: Drp-1 as Potential Therapeutic Target for Lipopolysaccharide-Induced Vascular Hyperpermeability
Source: Hindawi journal article supplement (doi:10.1155/2020/5820245), 2020-06-27

Figure s1

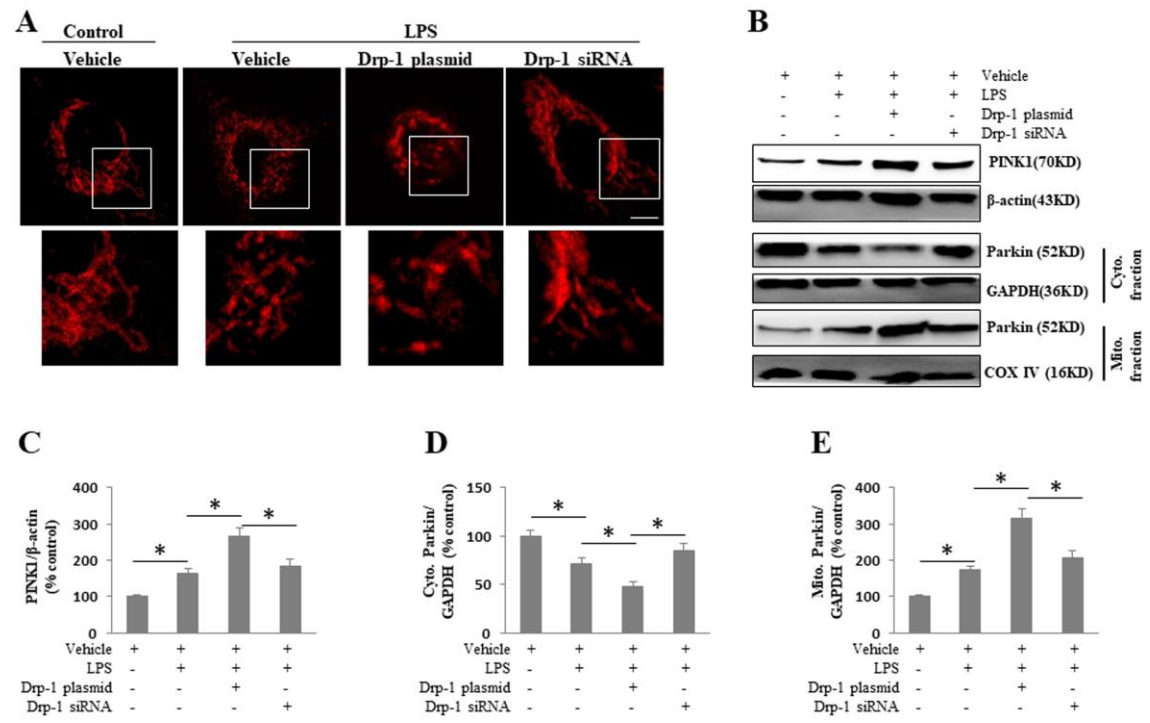

Figure s2

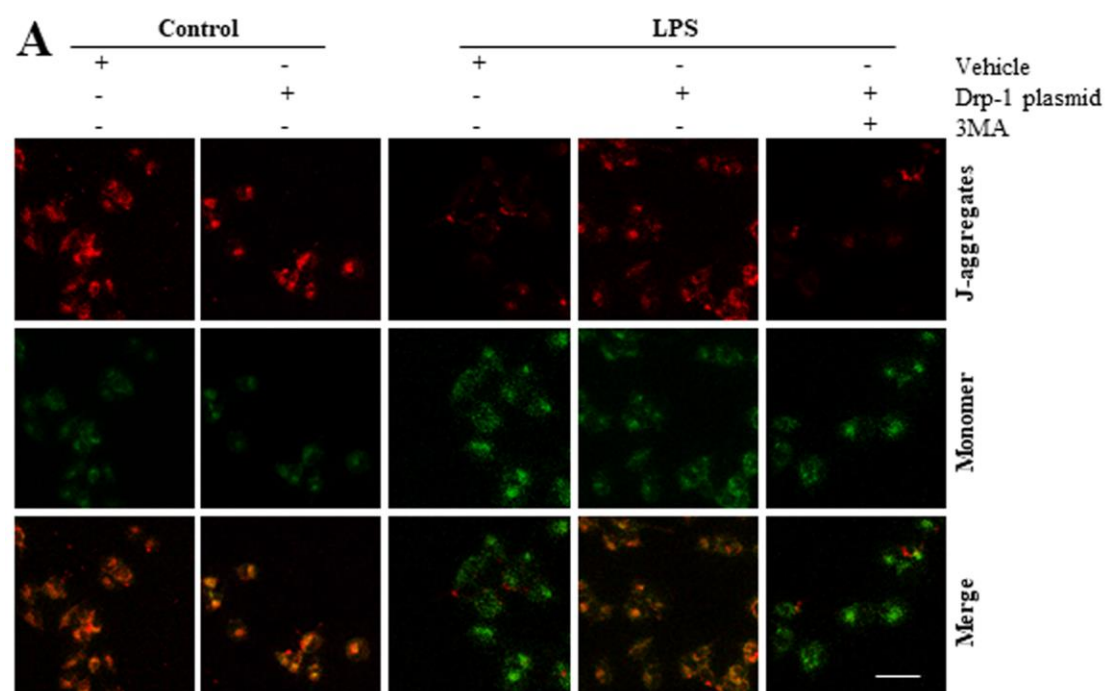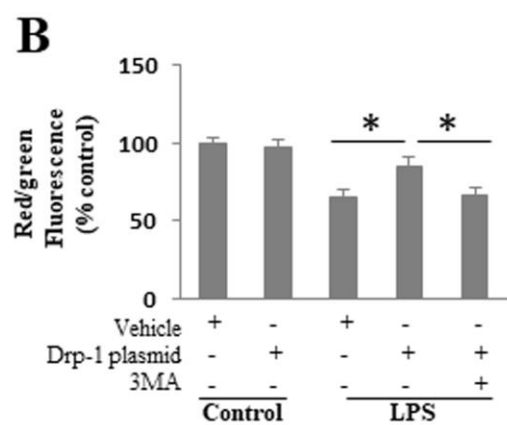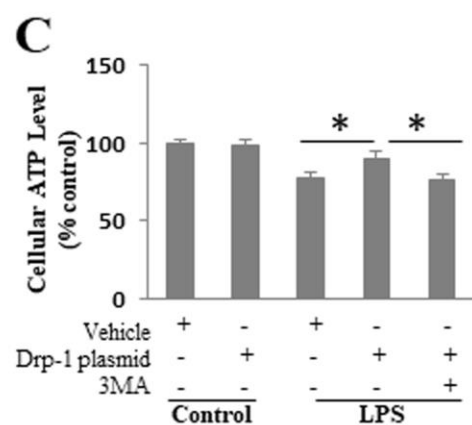

Supplement: f1 [file 5820245.f1.pdf]
